# Supplementary material for: Resensitisation of Methicillin-Resistant Staphylococcus aureus to Conventional Antibiotics in the Presence of an Engineered Enzybiotic
Source: MDPI journal article supplement (doi:10.3390/pharmaceutics15102511), 2023-10-23
Supplement: s1 [file s1]

SUPPLEMENTARY FIGURE

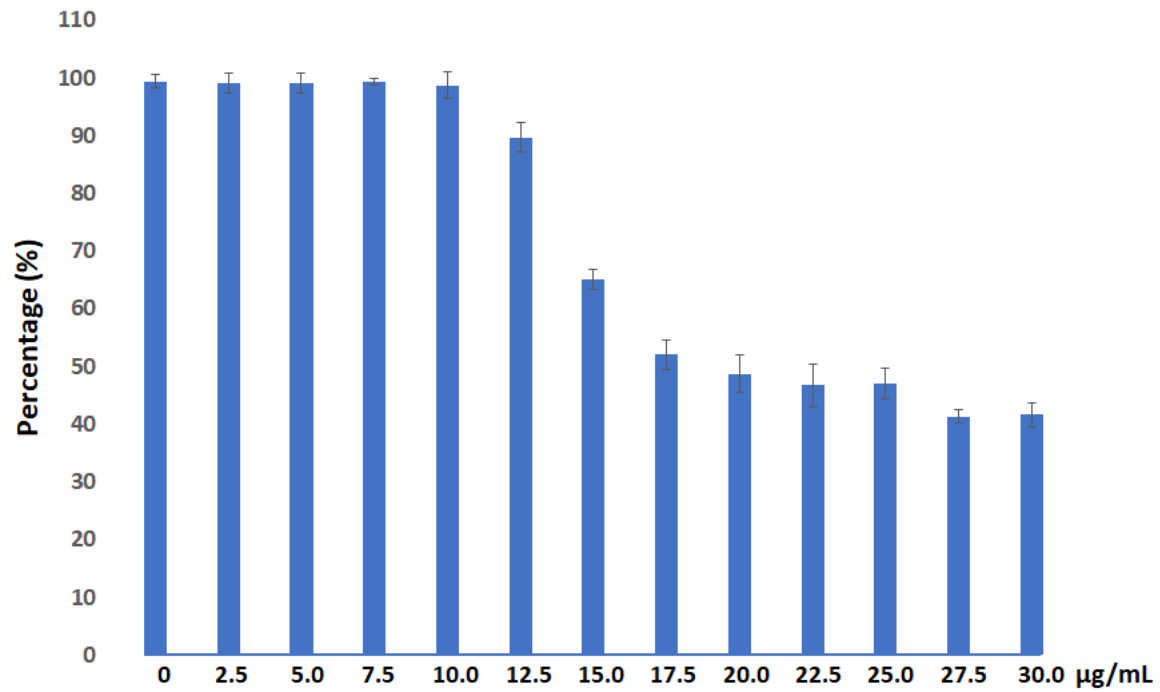

Figure S1. Viability of MRSA exposed to different concentration of BAC100. A 35 % reduction in viable MRSA cells was observed with 15.0  $\mu\text{g/ml}$  of the protein. The viable amount further reduced to 50 % with 15.0  $\mu\text{g/ml}$  of BAC100. No further reduction was observed even when the concentration of BAC100 was increased to 30  $\mu\text{g/ml}$ .
